# Supplementary material for: Unique features of HLA-mediated HIV evolution in a Mexican cohort: a comparative study
Source: PubMed Central journal article supplement (PMC2734549; doi:10.1186/1742-4690-6-72), 2009-08-10
Supplement: 1742-4690-6-72-S1.pdf [file 1742-4690-6-72-S1.pdf]

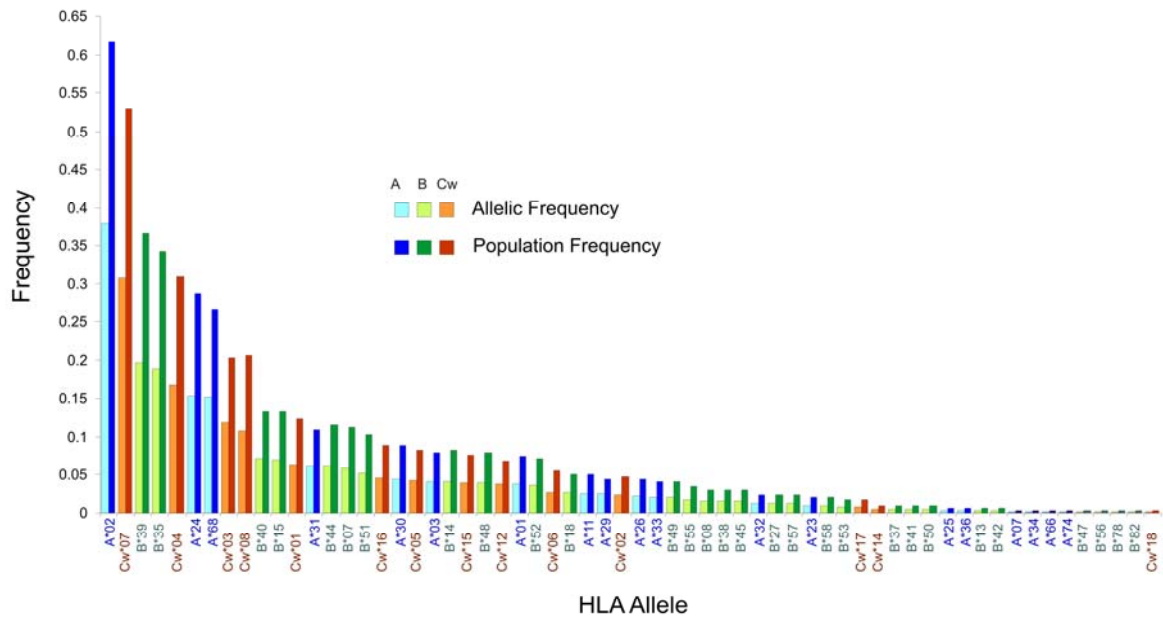

**Figure S1 - Allelic and population frequencies of class I HLA-A, B and C genes in a cohort of HIV-infected individuals from Central/Southern Mexico.**

Frequencies were obtained with the HLA Frequency Analysis Tool of the Los Alamos HIV Immunology Database ([www.hiv.lanl.gov/content/immunology/tools-links.html](http://www.hiv.lanl.gov/content/immunology/tools-links.html)). HLA typing was carried out by SSP-PCR as described in the Methods. A total of 292 individuals (584 HLA alleles) were included; 19, 29 and 14 distinct allelic groups were observed for the HLA-A, B and C genes respectively.

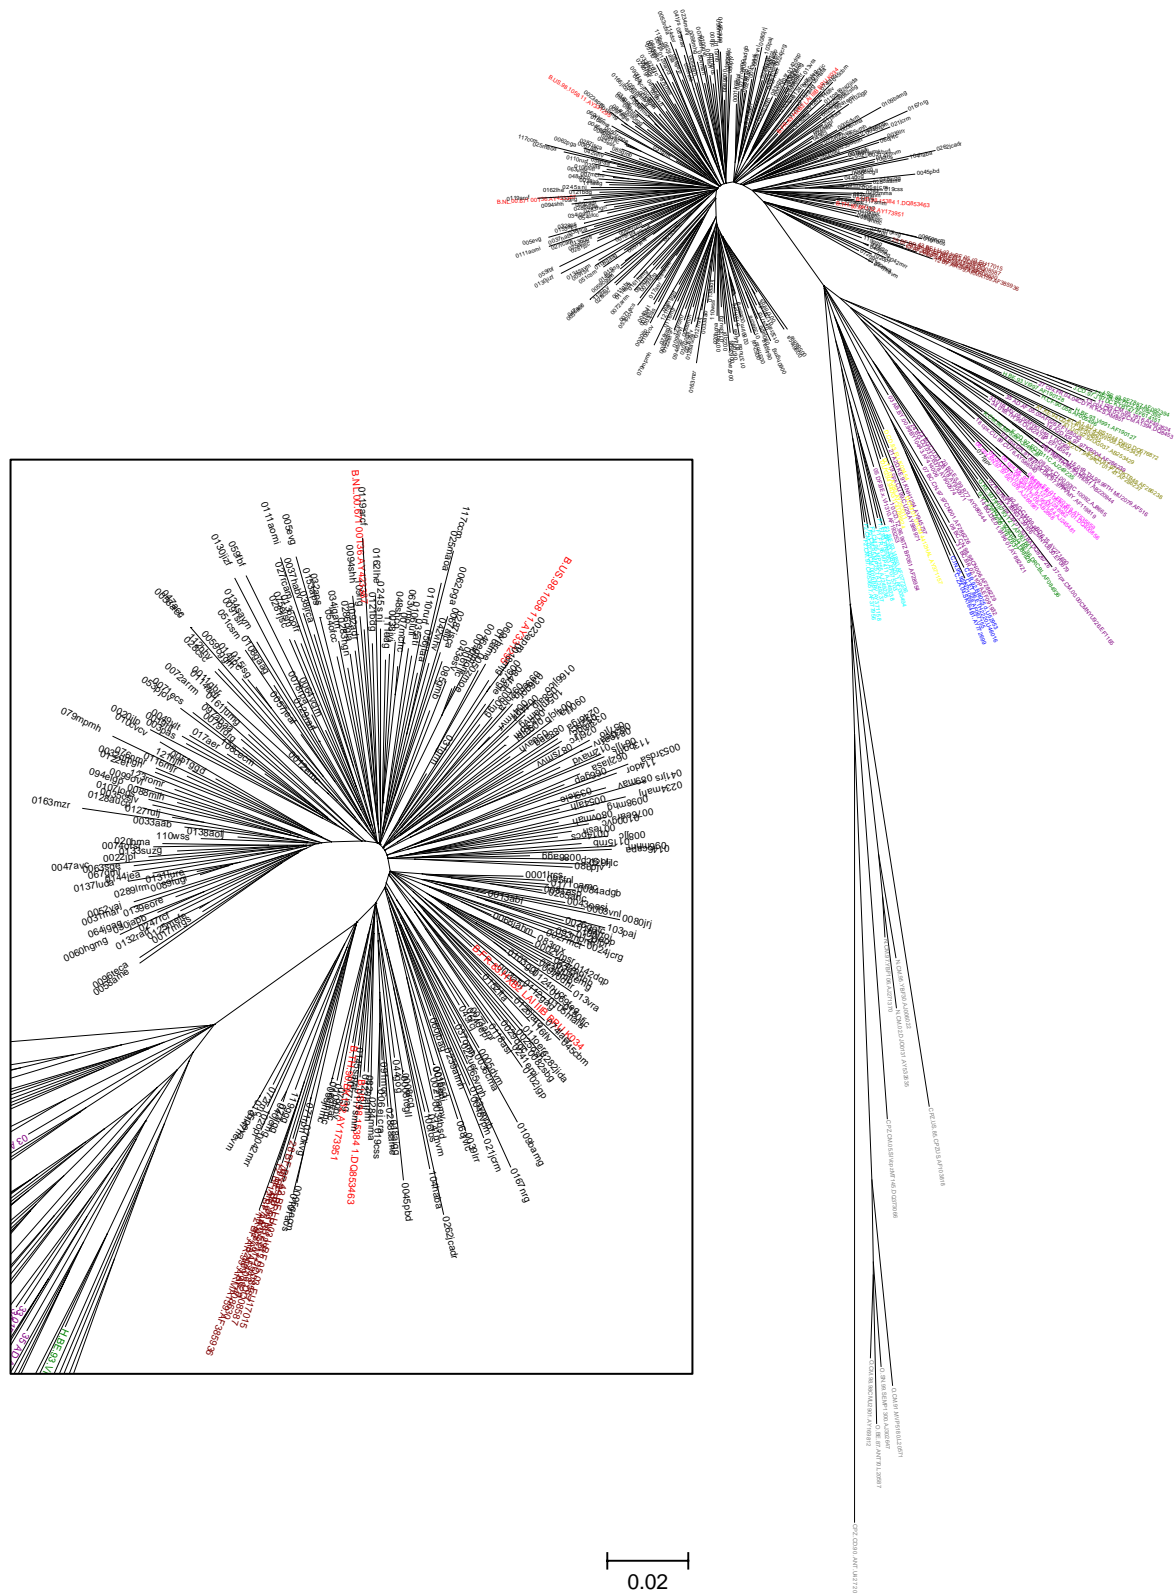

**Figure S2 - Phylogeny of 280 HIV *pol* sequences from a cohort of antiretroviral treatment-naïve individuals from Central/Southern Mexico.**

A Neighbor-Joining tree was inferred through the analysis of 1305 bp *pol* sequences including the whole protease and 335 codons of the RT in MEGA 4.0. The consensus tree from 1000 bootstrap replicas is shown. Evolutionary distances were calculated with Kimura's two-parameter model and are shown in substitutions per site. Positions with missing information were eliminated by pairwise comparison. 93 reference sequences of the main HIV-1 groups, subtypes and recombinant forms were obtained from the Los Alamos HIV Sequence Database (<http://www.hiv.lanl.gov/content/sequence/NEWALIGN/align.html>) and included in the tree. Black: Mexican sequences, red: subtype B, dark red: BF recombinant forms, olive: subtype A, dark blue: subtype C, yellow: subtype D, light blue: subtype F, green: subtypes G, H, J, K, fucsia: 06\_cpx recombinant forms, purple: other recombinant forms, grey: O-N groups and SIVs. The inset shows a detail of the Mexican sequence cluster.

**Table S1 – HLA-A, B and C population and allelic frequencies in the Mexican cohort. §**

| HLA   | Allelic Frequency | Population Frequency |
|-------|-------------------|----------------------|
| A*02  | 0.3784            | 0.6164               |
| Cw*07 | 0.3076            | 0.5292               |
| B*39  | 0.1969            | 0.3664               |
| B*35  | 0.1884            | 0.3425               |
| Cw*04 | 0.1684            | 0.3093               |
| A*24  | 0.1541            | 0.2877               |
| A*68  | 0.1524            | 0.2671               |
| Cw*03 | 0.1186            | 0.2027               |
| Cw*08 | 0.1082            | 0.2062               |
| B*40  | 0.0719            | 0.1336               |
| B*15  | 0.0702            | 0.1336               |
| Cw*01 | 0.0636            | 0.1237               |
| A*31  | 0.0616            | 0.1096               |
| B*44  | 0.0616            | 0.1164               |
| B*07  | 0.0582            | 0.113                |
| B*51  | 0.0531            | 0.1027               |
| Cw*16 | 0.0464            | 0.0893               |
| A*30  | 0.0445            | 0.089                |
| Cw*05 | 0.043             | 0.0825               |
| A*03  | 0.0411            | 0.0788               |
| B*14  | 0.0411            | 0.0822               |
| Cw*15 | 0.0395            | 0.0756               |
| B*48  | 0.0394            | 0.0788               |
| Cw*12 | 0.0378            | 0.0687               |
| A*01  | 0.0377            | 0.0753               |
| B*52  | 0.036             | 0.0719               |
| Cw*06 | 0.0275            | 0.055                |
| B*18  | 0.0274            | 0.0514               |
| A*11  | 0.0257            | 0.0514               |
| A*29  | 0.0257            | 0.0445               |
| Cw*02 | 0.0241            | 0.0481               |
| A*26  | 0.0223            | 0.0445               |
| A*33  | 0.0205            | 0.0411               |
| B*49  | 0.0205            | 0.0411               |
| B*55  | 0.0171            | 0.0342               |
| B*08  | 0.0154            | 0.0308               |
| B*38  | 0.0154            | 0.0308               |
| B*45  | 0.0154            | 0.0308               |
| A*32  | 0.012             | 0.024                |
| B*27  | 0.012             | 0.024                |
| B*57  | 0.012             | 0.024                |
| A*23  | 0.0103            | 0.0205               |

|       |        |        |
|-------|--------|--------|
| B*58  | 0.0103 | 0.0205 |
| B*53  | 0.0086 | 0.0171 |
| Cw*17 | 0.0086 | 0.0172 |
| Cw*14 | 0.0052 | 0.0103 |
| B*37  | 0.0051 | 0.0103 |
| B*41  | 0.0051 | 0.0103 |
| B*50  | 0.0051 | 0.0103 |
| A*25  | 0.0034 | 0.0068 |
| A*36  | 0.0034 | 0.0068 |
| B*13  | 0.0034 | 0.0068 |
| B*42  | 0.0034 | 0.0068 |
| A*07  | 0.0017 | 0.0034 |
| A*34  | 0.0017 | 0.0034 |
| A*66  | 0.0017 | 0.0034 |
| A*74  | 0.0017 | 0.0034 |
| B*47  | 0.0017 | 0.0034 |
| B*56  | 0.0017 | 0.0034 |
| B*78  | 0.0017 | 0.0034 |
| B*82  | 0.0017 | 0.0034 |
| Cw*18 | 0.0017 | 0.0034 |

---

§ HLA typing was carried out by SSP-PCR as described in Methods. A total of 292 individuals and 584 alleles were included.

**Table S2 - Linkage disequilibrium for class I HLA-A, B and C genes in the Mexican cohort. §**

| HLA1 | HLA2  | p-Value  | Both | Only HLA1 | Only HLA2 | None | P(HLA1) | P(HLA2) | P(HLA1 & HLA2) | E(P(HLA1 & HLA2)) |
|------|-------|----------|------|-----------|-----------|------|---------|---------|----------------|-------------------|
| B*35 | Cw*04 | 1.30E-33 | 78   | 22        | 11        | 177  | 0.3472  | 0.3090  | 0.2708         | 0.1073            |
| B*39 | Cw*07 | 4.40E-21 | 97   | 10        | 55        | 126  | 0.3715  | 0.5278  | 0.3368         | 0.1961            |
| B*15 | Cw*01 | 8.99E-15 | 25   | 13        | 10        | 240  | 0.1319  | 0.1215  | 0.0868         | 0.0160            |
| B*40 | Cw*03 | 1.08E-11 | 29   | 10        | 29        | 220  | 0.1354  | 0.2014  | 0.1007         | 0.0273            |
| B*14 | Cw*08 | 5.83E-11 | 22   | 2         | 38        | 226  | 0.0833  | 0.2083  | 0.0764         | 0.0174            |
| B*48 | Cw*08 | 3.63E-10 | 21   | 2         | 39        | 226  | 0.0799  | 0.2083  | 0.0729         | 0.0166            |
| B*44 | Cw*16 | 3.58E-07 | 16   | 18        | 9         | 245  | 0.1181  | 0.0868  | 0.0556         | 0.0102            |
| B*40 | Cw*07 | 2.84E-06 | 3    | 36        | 149       | 100  | 0.1354  | 0.5278  | 0.0104         | 0.0715            |
| B*38 | Cw*12 | 1.02E-05 | 8    | 1         | 12        | 267  | 0.0312  | 0.0694  | 0.0278         | 0.0022            |
| B*44 | Cw*05 | 2.66E-05 | 14   | 20        | 9         | 245  | 0.1181  | 0.0799  | 0.0486         | 0.0094            |
| B*18 | Cw*05 | 3.92E-04 | 9    | 5         | 14        | 260  | 0.0486  | 0.0799  | 0.0312         | 0.0039            |
| A*03 | B*07  | 4.23E-04 | 12   | 9         | 19        | 248  | 0.0729  | 0.1076  | 0.0417         | 0.0078            |
| A*01 | B*57  | 7.22E-04 | 6    | 15        | 0         | 267  | 0.0729  | 0.0208  | 0.0208         | 0.0015            |
| B*41 | Cw*17 | 2.54E-02 | 3    | 0         | 2         | 283  | 0.0104  | 0.0174  | 0.0104         | 0.0002            |
| B*07 | Cw*07 | 4.64E-02 | 28   | 3         | 124       | 133  | 0.1076  | 0.5278  | 0.0972         | 0.0568            |
| A*30 | B*39  | 5.35E-02 | 0    | 25        | 107       | 156  | 0.0868  | 0.3715  | 0.0000         | 0.0323            |
| B*52 | Cw*03 | 6.68E-02 | 13   | 7         | 45        | 223  | 0.0694  | 0.2014  | 0.0451         | 0.0140            |
| A*33 | B*14  | 6.88E-02 | 7    | 5         | 17        | 259  | 0.0417  | 0.0833  | 0.0243         | 0.0035            |
| B*51 | Cw*15 | 9.22E-02 | 10   | 20        | 12        | 246  | 0.1042  | 0.0764  | 0.0347         | 0.0080            |
| A*29 | Cw*16 | 1.92E-01 | 7    | 6         | 18        | 257  | 0.0451  | 0.0868  | 0.0243         | 0.0039            |
| A*30 | B*18  | 3.63E-01 | 7    | 18        | 7         | 256  | 0.0868  | 0.0486  | 0.0243         | 0.0042            |

§ 288 individuals from Central/Southern Mexico were included. Both: number of individuals expressing HLA1 and HLA2. Only HLA1: number of individuals expressing HLA1, but not HLA2. Only HLA2: number of individuals expressing HLA2, but not HLA1. None: number of individuals expressing neither HLA1 nor HLA2. P(HLA1): observed frequency of individuals expressing HLA1 in the cohort. P(HLA2): observed frequency of individuals expressing HLA2 in the cohort. P(HLA1 & HLA2): observed frequency of individuals expressing both HLA1 and HLA2 in the cohort. E(P(HLA1 & HLA2)): expected frequency of P(HLA1 & HLA2) if P(HLA1) and P(HLA2) were independent. The p-value for two-tail Fisher exact tests is shown. Estimation of the probability that P(HLA1) and P(HLA2) are independent given the observed information. A low p-value indicates that the occurrence of HLA1 and HLA2 is linked in the cohort. Number of two-way tests performed =  $A*B+A*C+B*C = 1190$ ; p-value for two-way comparisons =  $0.05/(A*B+A*C+B*C) = 4.202e-05$  for a confidence level of 95%.

**Table S3 - Protease and RT HLA-HIV codon associations observed in the Mexican cohort. §**

| Predictor Variable (HLA) | Target Variable (HIV codon) | TT | TF | FT  | FF  | p-value    | q-value    | Conditioning Variables (Coevolving codons, conditioning HLA)                                                                           | Reference           | Observations                                                                                                                                 |
|--------------------------|-----------------------------|----|----|-----|-----|------------|------------|----------------------------------------------------------------------------------------------------------------------------------------|---------------------|----------------------------------------------------------------------------------------------------------------------------------------------|
| A*03 <sup>b</sup>        | RT 277R                     | 19 | 2  | 56  | 195 | 1.20E-10   | 1.82E-06   |                                                                                                                                        | [34], [25], [37]    |                                                                                                                                              |
| A*03 <sup>a</sup>        | RT 277K                     | 2  | 19 | 195 | 56  | 1.20E-10   | 1.82E-06   |                                                                                                                                        | [34], [25], [37]    |                                                                                                                                              |
| A*30 <sup>a</sup>        | RT 281K                     | 18 | 5  | 251 | 3   | 0.00073383 | 0.13153195 |                                                                                                                                        | [37]                |                                                                                                                                              |
| A*33 <sup>a</sup>        | RT 122P                     | 1  | 11 | 67  | 191 | 0.0009406  | 0.14940166 | RT 98A <sup>c</sup>                                                                                                                    | [37]†               | Consistent (Escape from P in Mex, attraction to E in IHAC).                                                                                  |
| B*07 <sup>b</sup>        | RT 165I                     | 7  | 18 | 10  | 241 | 0.0005105  | 0.1175217  |                                                                                                                                        | [34], [37]          |                                                                                                                                              |
| B*07 <sup>a</sup>        | RT 165T                     | 18 | 7  | 240 | 10  | 0.00052215 | 0.1175217  |                                                                                                                                        | [34], [37]          |                                                                                                                                              |
| B*08 <sup>a</sup>        | RT 272A                     | 1  | 7  | 122 | 143 | 0.00174628 | 0.19533002 |                                                                                                                                        | [25]†, [37]†        | Different (B*42 escape from P in IHAC, B*08 has a much lower frequency in Mex).                                                              |
| B*18 <sup>b</sup>        | RT 138A                     | 3  | 10 | 1   | 266 | 0.00013697 | 0.05164684 |                                                                                                                                        | [25], [37]          |                                                                                                                                              |
| B*18 <sup>a</sup>        | RT 138E                     | 10 | 3  | 265 | 1   | 0.00013862 | 0.05164684 |                                                                                                                                        | [25], [37]          |                                                                                                                                              |
| B*18 <sup>b</sup>        | RT 245E                     | 4  | 8  | 22  | 240 | 0.00144187 | 0.18595855 | PR 45K <sup>c</sup> , B58 <sup>b</sup>                                                                                                 | [34]†, [37]†        | Different (B*57/58 escape from V to L, B*44 escape from E in IHAC; no B*18 association with p<0.05 in IHAC, no difference in HLA frequency). |
| B*27 <sup>a</sup>        | RT 135I                     | 1  | 6  | 153 | 94  | 0.00140863 | 0.1832374  | B*51 <sup>a</sup> , RT 202I <sup>d</sup> , PR 12N <sup>a</sup>                                                                         | [34]†, [25]†, [37]† | Different (B*51/52 escape from I to T/M in IHAC; B*27 less frequent in Mex).                                                                 |
| B*39 <sup>a</sup>        | PR 71V                      | 6  | 85 | 23  | 140 | 0.00121556 | 0.17636733 | PR 93L <sup>d</sup> , PR 57K <sup>b</sup>                                                                                              | [25]†, [37]†        | Different (B*53 escape from T in IHAC; B*39 much more frequent in Mex).                                                                      |
| B*39 <sup>a</sup>        | RT 102R                     | 0  | 96 | 17  | 153 | 0.00011626 | 0.04678005 | B*48 <sup>b</sup> , RT 64K <sup>a</sup>                                                                                                | [34]†, [37]†        | Different (B*48 K to R; B*39 much more frequent in Mex).                                                                                     |
| B*39 <sup>b</sup>        | RT 64R                      | 5  | 91 | 4   | 166 | 0.00166664 | 0.1905207  | RT 102R <sup>d</sup>                                                                                                                   | NR                  | No close association in IHAC.                                                                                                                |
| B*39 <sup>a</sup>        | RT 64K                      | 91 | 5  | 166 | 4   | 0.00166664 | 0.1905207  | RT 102R <sup>c</sup>                                                                                                                   | NR                  | No close association in IHAC.                                                                                                                |
| B*40 <sup>b</sup>        | RT 202V                     | 5  | 27 | 10  | 186 | 0.00100069 | 0.15487079 | RT 135I <sup>a</sup> , RT 197E <sup>b</sup> , PR 35E <sup>d</sup> , RT 334L <sup>a</sup> , RT 165I <sup>d</sup> , RT 122P <sup>b</sup> | NR                  | No close association in IHAC; no difference in HLA frequency among cohorts.                                                                  |
| B*40 <sup>a</sup>        | RT 202I                     | 27 | 5  | 186 | 10  | 0.00100069 | 0.15487079 | RT 135I <sup>b</sup> , RT 197E <sup>a</sup> , PR 35E <sup>c</sup> , RT 334L <sup>b</sup> , RT 165I <sup>c</sup> , RT 122P <sup>a</sup> | NR                  | No close association in IHAC; no difference in HLA frequency among cohorts.                                                                  |
| B*44 <sup>b</sup>        | PR 35D                      | 21 | 10 | 33  | 210 | 2.78E-09   | 1.40E-05   |                                                                                                                                        | [34], [25], [37]    |                                                                                                                                              |
| B*44 <sup>a</sup>        | PR 35E                      | 9  | 22 | 210 | 33  | 6.65E-10   | 6.69E-06   |                                                                                                                                        | [34], [25], [37]    |                                                                                                                                              |
| B*44 <sup>b</sup>        | RT 211K                     | 22 | 6  | 106 | 115 | 0.00185231 | 0.19533002 | PR 43K <sup>c</sup> , RT 196E <sup>a</sup>                                                                                             | [34]†, [37]†        | Consistent (R to K in Mex, just escape from R in IHAC).                                                                                      |
| B*44 <sup>a</sup>        | RT 211R                     | 2  | 28 | 94  | 128 | 4.19E-05   | 0.02767678 |                                                                                                                                        | [34], [37]          |                                                                                                                                              |

|                    |         |     |     |     |     |            |            |                                            |                   |                                                                                                                           |
|--------------------|---------|-----|-----|-----|-----|------------|------------|--------------------------------------------|-------------------|---------------------------------------------------------------------------------------------------------------------------|
| B*44 <sup>a</sup>  | RT 329I | 14  | 15  | 203 | 30  | 0.00130602 | 0.18323349 | RT 334L <sup>b</sup>                       | [37]†             | Different (B*53 escape from V in IHAC; B*44 less frequent in Mex).                                                        |
| B*44 <sup>d</sup>  | RT 123N | 7   | 25  | 3   | 236 | 0.00152115 | 0.18684048 | RT 122E <sup>d</sup>                       | [34]†, [25]†      | Different (B*35 D to E in IHAC).                                                                                          |
| B*44 <sup>c</sup>  | RT 68S  | 26  | 7   | 232 | 7   | 0.00185709 | 0.19533002 | PR 41R <sup>c</sup> , RT 139T <sup>d</sup> | NR                | No close association in IHAC.                                                                                             |
| B*44 <sup>d</sup>  | RT 68G  | 7   | 26  | 7   | 232 | 0.00185709 | 0.19533002 | PR 41R <sup>d</sup> , RT 139T <sup>c</sup> | NR                | No close association in IHAC.                                                                                             |
| B*45 <sup>b</sup>  | RT 200A | 5   | 3   | 37  | 220 | 0.00072663 | 0.13153195 |                                            | [34]†, [37]†      | Different (B*40/41 attraction to I, B*08 escape from A, B*37 escape from T in IHAC; no difference in B*45 frequency).     |
| B*48 <sup>b</sup>  | RT 102R | 10  | 8   | 7   | 249 | 2.54E-09   | 1.40E-05   |                                            | [34], [37]        |                                                                                                                           |
| B*48 <sup>a</sup>  | RT 102K | 8   | 10  | 227 | 28  | 2.83E-05   | 0.02083046 |                                            | [34], [37]        |                                                                                                                           |
| B*49 <sup>b</sup>  | RT 50V  | 3   | 9   | 3   | 265 | 0.00078914 | 0.13651316 |                                            | NR                | No close association in IHAC; no difference in HLA frequency among cohorts.                                               |
| B*49 <sup>a</sup>  | RT 50I  | 9   | 3   | 265 | 3   | 0.00078914 | 0.13651316 |                                            | NR                | No close association in IHAC; no difference in HLA frequency among cohorts.                                               |
| B*51 <sup>b</sup>  | PR 12S  | 5   | 23  | 2   | 249 | 7.70E-05   | 0.03639581 |                                            | [34]†, [37]†      | Consistent (escape from T, weak attraction to S [p=0.02] in IHAC).                                                        |
| B*51 <sup>b</sup>  | PR 14R  | 10  | 13  | 20  | 212 | 0.00064885 | 0.13057972 | RT 135I <sup>a</sup>                       | [34], [37]†       |                                                                                                                           |
| B*51 <sup>a</sup>  | PR 14K  | 12  | 10  | 212 | 20  | 0.00052685 | 0.1175217  | RT 135I <sup>b</sup>                       | [34], [37]†       |                                                                                                                           |
| B*51 <sup>a</sup>  | RT 135I | 4   | 20  | 155 | 84  | 6.58E-08   | 0.00016543 |                                            | [34], [25]†, [37] |                                                                                                                           |
| B*52 <sup>b</sup>  | PR 12A  | 7   | 8   | 9   | 247 | 2.44E-06   | 0.00319527 |                                            | [34], [37]†       |                                                                                                                           |
| B*52 <sup>a</sup>  | PR 12T  | 4   | 13  | 215 | 37  | 9.21E-08   | 0.00019546 |                                            | [34], [37]†       |                                                                                                                           |
| B*57 <sup>b</sup>  | RT 297A | 4   | 3   | 33  | 239 | 0.0014485  | 0.18601806 |                                            | NR                | No close association in IHAC (B*58 has attraction to R with p=0.03, q=0.88).                                              |
| Cw*04 <sup>a</sup> | RT 248D | 0   | 88  | 11  | 180 | 0.00160017 | 0.18790507 |                                            | [25]†, [37]†      | Different (Cw*02 escape from E, B*15 escape from D in IHAC; B*15 appears to be in slight negative LD with Cw*04).         |
| Cw*07 <sup>c</sup> | RT 276V | 111 | 32  | 116 | 8   | 7.21E-05   | 0.03639581 |                                            | NR                | The attraction to V is nearly seen as a Cw*08 association in IHAC (q=0.22); no difference in HLA frequency among cohorts. |
| Cw*07 <sup>d</sup> | RT 276T | 11  | 131 | 1   | 130 | 0.00152896 | 0.18684048 | RT 272P <sup>d</sup>                       | NR                | The attraction to V is nearly seen as a C*08 association in IHAC (q=0.22); no difference in HLA frequency among cohorts.  |
| Cw*07 <sup>a</sup> | RT 179D | 0   | 147 | 8   | 125 | 0.00061063 | 0.12536221 |                                            | NR                | No close association in IHAC; Cw*08 is weakly assoc with escape from V (p=0.006, q=0.42).                                 |
| Cw*07 <sup>c</sup> | RT 278Q | 137 | 8   | 129 | 1   | 0.00130929 | 0.18323349 | RT 281R <sup>a</sup>                       | [25]†, [37]†      | Different (Cw*12 attraction to V is somewhat close, q=0.22).                                                              |
| Cw*15 <sup>a</sup> | PR 18Q  | 18  | 4   | 253 | 4   | 0.00118543 | 0.17492044 |                                            | NR                | No close associations (p<0.05) in IHAC; no difference in HLA frequency among cohorts.                                     |

§ 280 individuals from Central/Southern Mexico were included. Associations with q<0.2 are shown. NR – Not previously reported associations. †HIV codon has been previously reported to be under HLA pressure, but HLA specificity and/or target amino acid are different to that observed in the present study. TT, TF, FT, FF: 2x2 contingency tables; HLA is the first value, amino acid is the second value. <sup>a</sup> escape (having the predictor makes it less likely to have the target), <sup>b</sup> attraction (having the predictor makes it more likely to have the target), <sup>c</sup> reversion (not having the predictor makes it more likely to have the target), <sup>d</sup> repulsion (not having the predictor makes it less likely to have the target).
